# Supplementary material
Source: Research Square preprint supplement (doi:10.21203/rs.3.rs-9380960/v1)

# Genetic Therapies

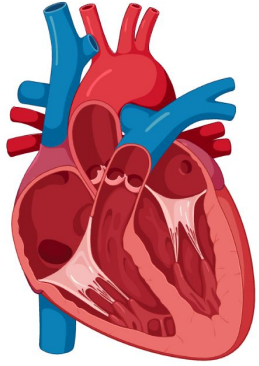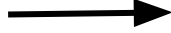

**DNA**

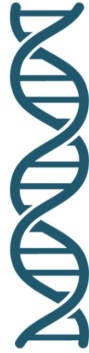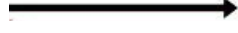

**RNA**

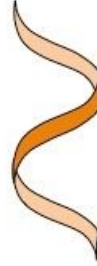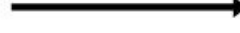

**Protein**

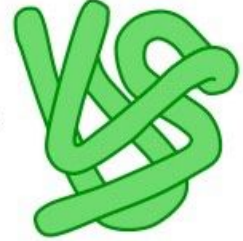

# HCM

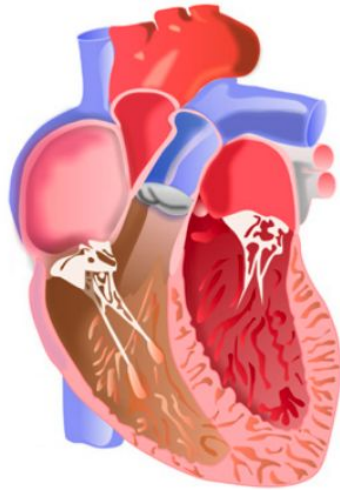

**Normal**

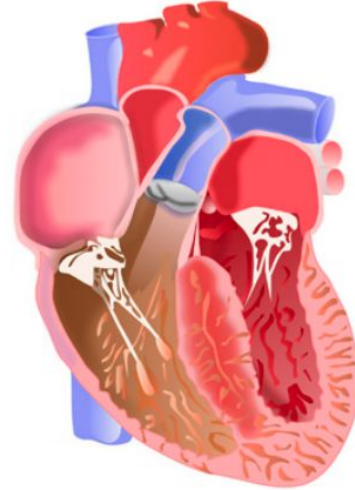

**Hypertrophic  
Cardiomyopathy**

# DCM

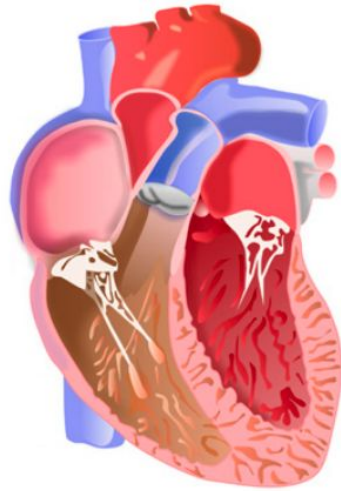

**Normal**

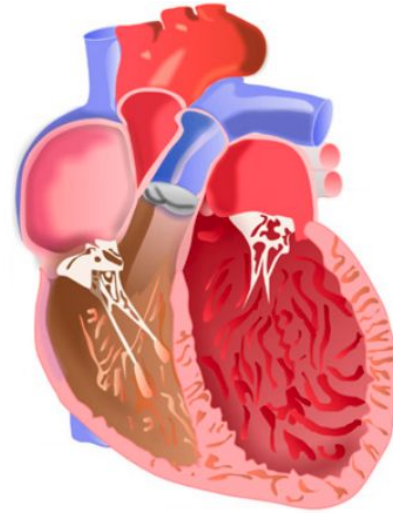

**Dilated  
Cardiomyopathy**

# Gene Therapy

Working gene copy

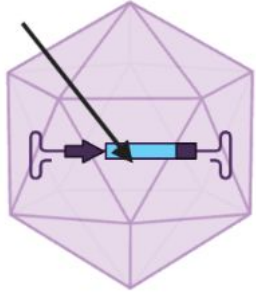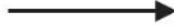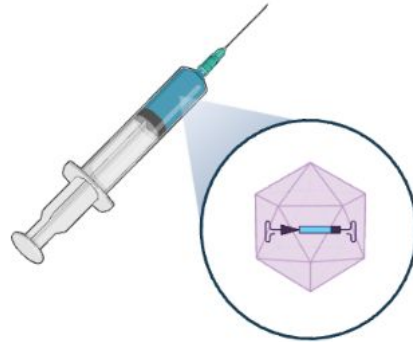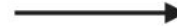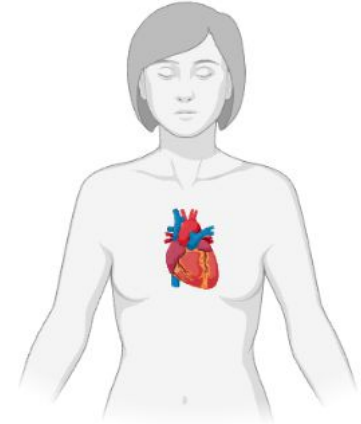

Working gene copy is delivered directly to the patient via an injection

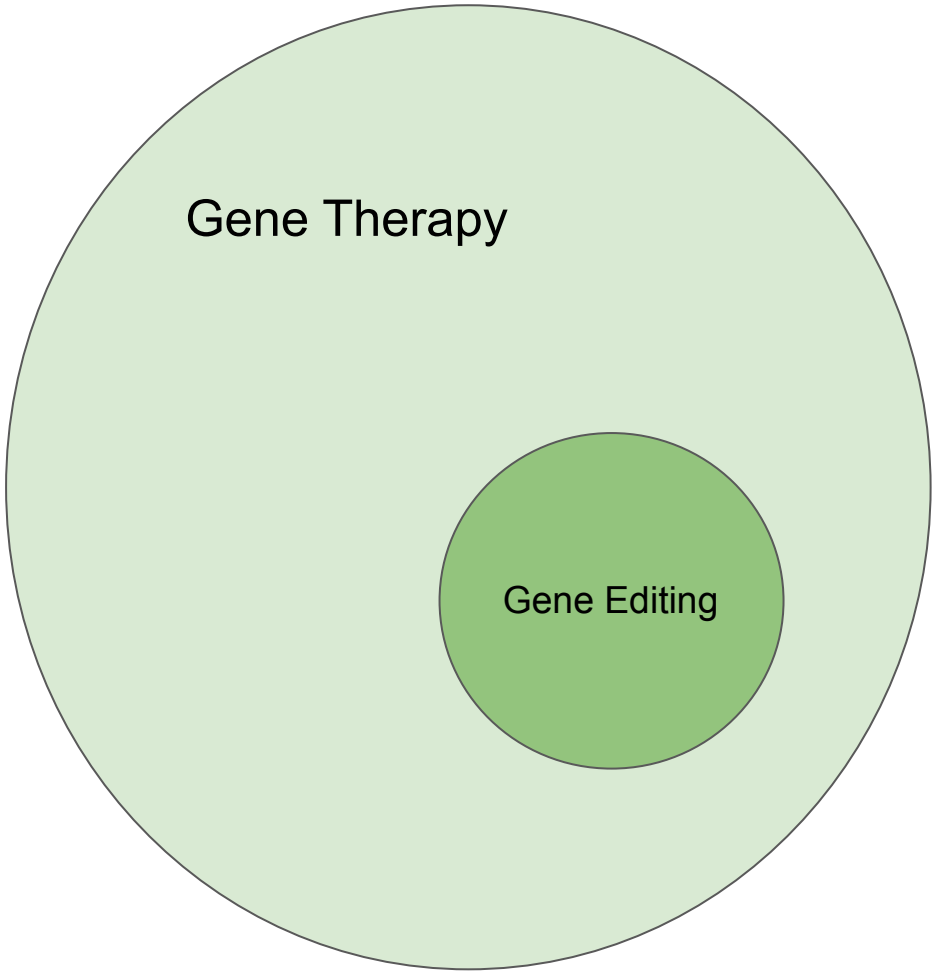

Gene Therapy

Gene Editing

# Gene Editing

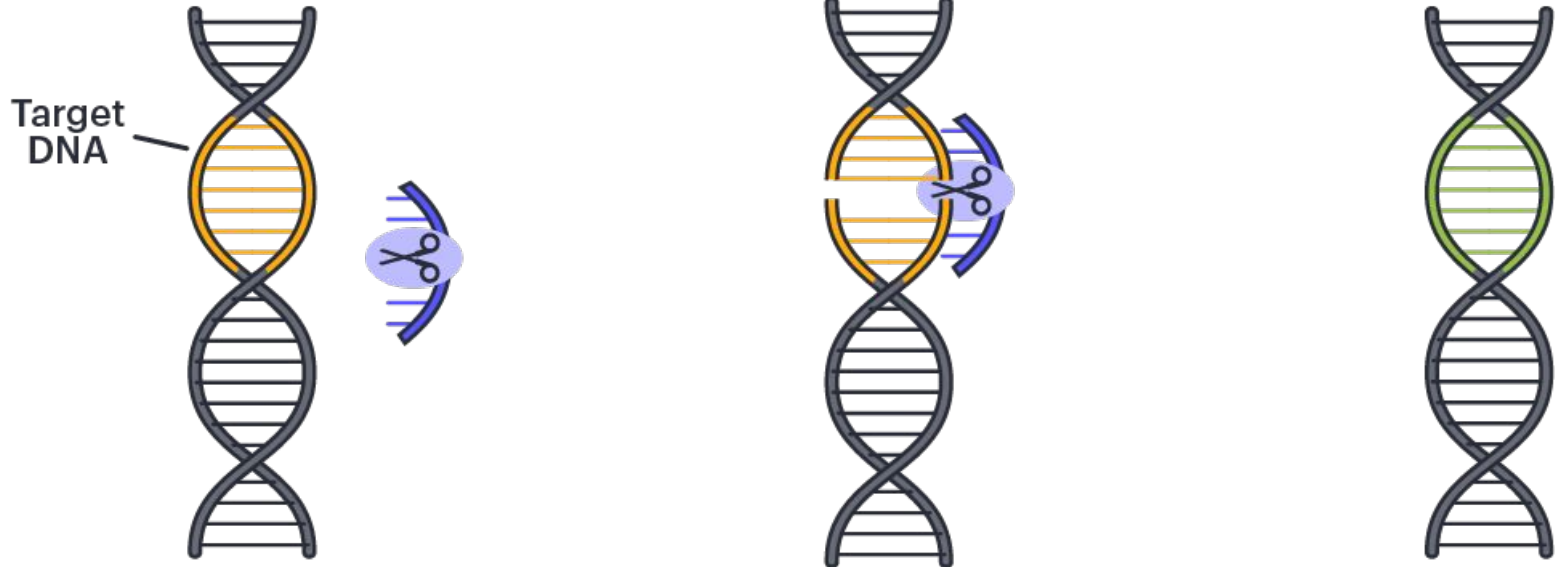

Supplement: Supplementary file 1 [file 547f061b15477f3db9601fb0.pdf]
