# Supplementary material
Source: Research Square preprint supplement (doi:10.21203/rs.3.rs-9380960/v1)
Supplement: Supplementary file 2 [file ab671e9ef4e6698b419e5689.docx]

# **SUPPLEMENTAL METHODS**

**Interview Guide Development**

The interview guide was developed by four investigators with expertise in genetics - one genetic counseling student (AN), two genetic counselors (KO and RM), and one adult cardiologist (MW). The guide was based on a literature review of gene therapy, gene editing, the related stakeholder views, and their applications for cardiomyopathies. In developing the interview guide, we also utilized a modified version of the Genomic Medicine Integrative Research (GMIR) Framework. GMIR is a comprehensive tool to aid the genomics community in developing research questions, strategies, and measures and in integrating genomic medicine and prevention into clinical practice.1 This framework highlights multiple contextual factors such as individual and family factors, social determinants of health, etc. that influence the implementation of healthcare interventions such as patient education and testing. The implementation of these interventions can then result in different processes and outcomes in the healthcare system.

The final interview guide (Appendix 1) was framed similar to that of Snure-Beckman et al., 2019 and consisted of 15 open-ended questions.2 The guide addressed patients’ experiences with their condition, genetic literacy for gene therapy and gene editing, benefits and barriers to the clinical implementation of these technologies for their condition, and hypothetical interest in their utilization for patients and family members. AN and RM piloted the guide before implementation. An informational slide deck outlining the basic concepts of gene therapy and gene editing was developed (Appendix 2) and presented to all participants during the interview to ensure that they had a consistent baseline understanding of these concepts.

**Data Analysis**

Prior knowledge was categorized by AN as having no knowledge (never heard about gene therapy), low (having heard of genetic therapies or having incorrect knowledge about it), moderate (awareness of gene therapy as a concept but not details of it), and high (working knowledge of gene-therapy technology such as vectors, gene editing, or CRISPR). Participants’ current clinical severity was categorized by researchers into three groups - severe, moderate, and mild - based on reported symptoms and condition progression. Patients with a severe clinical presentation experienced multiple symptoms or progressive disease. Those with a moderate severity had non-progressive disease and a few symptoms of the condition. Patients with a mild clinical severity were either asymptomatic or experienced relatively few symptoms, with no impact on quality of life.

With regards to the qualitative data analysis, a single investigator (AN) read all transcripts for familiarization and wrote short summaries of the key information from each interview.3-4 Transcripts were not returned to participants for comments, corrections, or feedback. No repeat interviews were performed.

When developing the codebook, deductive approaches were based on findings from existing literature and professional expertise with the topic, while inductive approaches were based on emerging data from transcripts. Four members of the research team (AN, KR, KO, and RM) independently coded the first transcript. The codebook and coding were discussed in a meeting and code modifications were incorporated.5 This was repeated for the second transcript. A third round of coding was conducted by two investigators (AN, KR), who then finalized the codebook. Subsequently, a single investigator (AN) coded all remaining transcripts, with every fifth transcript being co-coded (by KR) to ensure consistency.

Coded excerpts were analyzed and grouped into parent codes and child codes to identify emerging themes, and participant quotes were used to further highlight these themes. Transcripts were revisited to confirm alignment of themes with the data. Four members of the research team (AN, KO, RM, MW) reviewed these themes and provided feedback to check the potential biases of AN and to strengthen the interpretation and credibility of the data. Quotes were edited to remove filler words (e.g. “like” and “you know”).

#

**References for Supplemental Methods**

1. Horowitz CR, Orlando LA, Slavotinek AM, Peterson J, Angelo F, Biesecker B, Bonham VL, Cameron LD, Fullerton SM, Gelb BD, Goddard KA. The genomic medicine integrative research framework: a conceptual framework for conducting genomic medicine research. The American Journal of Human Genetics. 2019 Jun 6;104(6):1088-96.
2. Snure Beckman E, Deuitch N, Michie M, Allyse MA, Riggan KA, Ormond KE. Attitudes toward hypothetical uses of gene-editing technologies in parents of people with autosomal aneuploidies. The CRISPR Journal. 2019 Oct 1;2(5):324-30.
3. Birks M, Chapman Y, Francis K. Memoing in qualitative research: Probing data and processes. Journal of research in nursing. 2008 Jan;13(1):68-75.
4. Miles MB, Huberman AM. Qualitative data analysis: An expanded sourcebook. sage; 1994 Jan 12.
5. MacQueen KM, McLellan E, Kay K, Milstein B. Codebook development for team-based qualitative analysis. Cam Journal. 1998 May;10(2):31-6.

# **SUPPLEMENTAL TABLES**

#

# **Supplemental Table 1: Demographics of participants (N=21)**

|  | **N (%)** |
| --- | --- |
| **Sex assigned at birth** |  |
| Female | 12 (57) |
| Male | 9 (43) |
| **Condition** |  |
| HCM | **17 (81)** |
| DCM | **4 (19)** |
| **Age** |  |
| 18-24 | **1 (5)** |
| 25-34 | **0 (0)** |
| 35-44 | **4 (19)** |
| 45-54 | **3 (14)** |
| 55-64 | **7 (33)** |
| 65-74 | **5 (24)** |
| 75-84 | **1 (5)** |
| **Self-reported ethnicity** |  |
| White | **15 (71)** |
| East Asian | **1 (5)** |
| South Asian | **1 (5)** |
| Multiple ethnicities | **2 (10)** |
| Other | **1 (5)** |
| Prefer not to disclose | **1 (5)** |
| **Age of cardiomyopathy diagnosis** |  |
| Childhood | **2 (10)** |
| Adolescence | **1 (5)** |
| Adulthood | **18 (85)** |
| **Highest level of education completed** |  |
| Some college credit, no degree | **1 (5)** |
| Trade or vocational training | **1 (5)** |
| Bachelor’s degree | **10 (47)** |
| Graduate degree (MS, JD, MD, PhD,  PharmD, etc.) | **8 (38)** |
| Prefer not to disclose | **1 (5)** |
| **When reading educational materials about my condition (booklets, pamphlets, leaflets, and advertising), it is:** |  |
| Very easy for me | **12 (57)** |
| Easy for me | **8 (38)** |
| Neither easy nor difficult | **1 (5)** |
| Difficult for me | **0 (0)** |
| Very difficult for me | **0 (0)** |

## **Supplemental Table 2: Demographics of individual participants (N=21)**

| **Participant No.** | **Condition** | **Age** | **Age at Diagnosis** | **Ethnicity** | **Sex assigned at birth** | **Highest level of education** | **When reading educational**  **materials about my**  **condition (booklets,**  **pamphlets, leaflets,**  **and advertising), it is:** |
| --- | --- | --- | --- | --- | --- | --- | --- |
| 1 | HCM | 38 | 3 | Hispanic, Latino, or Spanish origin, White | Female | Bachelor’s degree | Very easy for me |
| 2 | HCM | 71 | 46 | White | Female | Bachelor’s degree | Very easy for me |
| 3 | DCM | 61 | 43 | White | Female | Graduate degree (MS, JD, MD, PhD, PharmD, etc.) | Very easy for me |
| 4 | HCM | 44 | 41 | White | Female | Graduate degree (MS, JD, MD, PhD, PharmD, etc.) | Very easy for me |
| 5 | HCM | 64 | 47 | White | Female | Bachelor’s degree | Easy for me |
| 6 | HCM | 64 | 47 | White | Male | Graduate degree (MS, JD, MD, PhD, PharmD, etc.) | Very easy for me |
| 7 | HCM | 52 | 39 | White | Female | Some college credit, no degree | Very easy for me |
| 8 | HCM | 47 | 11 | Other | Male | Prefer not to answer | Very easy for me |
| 9 | HCM | 24 | 18 | American Indian or Alaskan Native,  Black or African American,Hispanic, Latino, or Spanish origin | Female | Trade/technical/  vocational training | Very easy for me |
| 10 | HCM | 64 | 21 | Prefer not to disclose | Female | Bachelor’s degree | Easy for me |
| 11 | DCM | 38 | 35 | East Asian (Chinese, Japanese, Korean, Mongolian, Tibetan, Taiwanese) | Female | Bachelor’s degree | Easy for me |
| 12 | HCM | 63 | 44 | White | Male | Graduate degree (MS, JD, MD, PhD, PharmD, etc.) | Easy for me |
| 13 | DCM | 69 | 68 | White | Male | Bachelor’s degree | Easy for me |
| 14 | HCM | 69 | 61 | White | Male | Bachelor’s degree | Very easy for me |
| 15 | HCM | 49 | 47 | White | Male | Graduate degree (MS, JD, MD, PhD, PharmD, etc.) | Neither easy nor difficult |
| 16 | HCM | 80 | 65 | White | Male | Graduate degree (MS, JD, MD, PhD, PharmD, etc.) | Easy for me |
| 17 | HCM | 42 | 30 | South Asian (Bangladeshi, Bhutanese, Indian, Nepali, Pakistani, Sri Lankan) | Male | Graduate degree (MS, JD, MD, PhD, PharmD, etc.) | Very easy for me |
| 18 | HCM | 69 | 59 | White | Female | Bachelor’s degree | Very easy for me |
| 19 | HCM | 64 | 45 | White | Male | Bachelor’s degree | Easy for me |
| 20 | HCM | 67 | 33 | White | Female | Graduate degree (MS, JD, MD, PhD, PharmD, etc.) | Easy for me |
| 21 | DCM | 55 | 38 | White | Female | Bachelor’s degree | Very easy for me |

## **Supplemental Table 3: Individual treatment preferences of each participant**

| **Participant No.** | **Most Preferred** | **Choice 2** | **Choice 3** | **Choice 4** | **Choice 5** |
| --- | --- | --- | --- | --- | --- |
| 1 | Gene editing | Daily pills | ICD | Gene therapy | Cardiac surgery |
| 2 | Daily pills | ICD | Gene therapy | Gene editing | Cardiac surgery |
| 3 | Gene therapy or gene editing* | Gene therapy or gene editing* | Daily pills | ICD | Cardiac surgery |
| 4 | Gene therapy | Gene editing | Cardiac surgery | Daily pills | ICD |
| 5 | Gene therapy | Gene editing | Daily pills | Cardiac surgery | ICD |
| 6 | Gene therapy or gene editing* | Gene therapy or gene editing* | Daily pills | Cardiac surgery | ICD |
| 7 | Gene editing | Gene therapy | Daily pills | Cardiac surgery | ICD |
| 8 | Gene editing | Gene therapy | Cardiac surgery | Daily pills | ICD |
| 9 | Gene therapy | Cardiac surgery | ICD | Gene editing | Daily pills |
| 10 | Daily pills | ICD | Cardiac surgery | Gene editing | Gene therapy |
| 11 | Gene editing | Gene therapy | Cardiac surgery | Daily pills | ICD |
| 12 | Daily pills | ICD | Gene editing | Gene therapy | Cardiac surgery |
| 13 | Gene therapy or gene editing* | Gene therapy or gene editing* | Cardiac surgery | ICD | Daily pills |
| 14 | Gene therapy | Gene editing | Daily pills | ICD | Cardiac surgery |
| 15 | Gene therapy | Gene editing | Daily pills | Cardiac surgery | ICD |
| 17 | Gene editing | Gene therapy | Daily pills | ICD | Cardiac surgery |
| 19 | Daily pills | Cardiac surgery | ICD | Gene editing | Gene therapy |
| 20 | Gene editing | Cardiac surgery | Gene therapy | Daily pills | ICD |
| 21 | Gene therapy | Gene editing | ICD/ Daily Pills | Daily pills/ ICD | Cardiac surgery |

## **Two participants (participants 16 and 18) did not complete the ranking as requested, as they perceived that the ranking to be too hypothetical.**
