# Supplementary material
Source: Research Square preprint supplement (doi:10.21203/rs.3.rs-9380960/v1)
Supplement: Supplementary file 3 [file efdf7ce7730222223f788ae8.docx]

**Appendix 1: Semi-structured interview guide**

**Introduction**: Hi [patient’s name], my name is [interviewer]. How are you today?

Thank you for meeting with me today. During this interview, I’m hoping to learn more about your experiences with [hypertrophic/ dilated] cardiomyopathy as well as your thoughts, feelings, and attitudes toward gene therapy and gene editing.

- Purpose: Some HCM and DCM gene therapy research has progressed to the stage of early clinical trials, showing that gene therapy and gene editing approaches for cardiomyopathies are already in the pipeline. There is a need to involve patients with HCM and DCM in this conversation before these technologies are clinically implemented in the near future.
- It’ll be a ~60 minute conversation during which I can get to know your perspective better. The interview will be audio recorded, transcribed, and then transcripts will be de-identified (so all your health or personal information that could be identifiers will be removed).
- Any questions?
- I would also like to confirm that you consent to participating in this study and that you still want to move forward?

*turn on recording*

- I’d like to confirm some things from the survey that you filled out:
  - Confirm if they meet criteria and restate their demographics

1) **Let’s start with your personal experience with [hypertrophic/ dilated] cardiomyopathy from the time you were diagnosed, to today and what that has looked like?**

Probes:

- How does this condition affect or impact your quality of life overall?
  - Something that is impacting you daily or you think about all day long? Something that you think about once in a while? Only when particular symptoms come up?
- What was or has been the most challenging part of your diagnosis?
  - Any specific anecdotes or stories you can share about this?
  - What feelings arose during that?
- Follow up with: have there been any good things that have come out of your diagnosis?
- How has your perspective of living with HCM/ DCM changed from the time you were diagnosed to today?

2) **What has been your experience with medical therapies? Medications, devices, procedures, and lifestyle changes *since you got the diagnosis? This might include anything from your doctor telling you to change your lifestyle to getting a new treatment or medication or device.**

Probes:

- Since your diagnosis, have you had to take a lot of medication? How has that been for you and have there been any side effects?
- Have you had to have any surgeries or other medical procedures or hospitalizations? How has that been?
- What lifestyle changes have you implemented and what has that looked like?

**3) What if anything, have you heard about gene therapy and gene editing?**

***Slideshow on basics of genetic therapies for cardiomyopathies***

- Slide 2-4: Genetics + gene-disease mechanism [basics of genetics and how a gene causes disease (HCM/DCM) specific]
- Slide 5: Gene therapy overview
- Slide 6,7: Gene editing overview

4) **What questions do you have about the information I shared?**

5) **Now that I've told you about both, do you feel differently about gene therapy and gene editing or the same about both of them?**

6) **Based on your knowledge of gene therapy and gene editing, what are your opinions and attitudes towards it?**

Probes:

- What are your initial thoughts and feelings about gene editing?
- What concerns do you have, if any, regarding gene editing?
- What benefits do you see with gene editing?
- What further information would you want about it before you make a decision about whether to pursue genetic therapies?
- What are your limits to gene editing for HCM/ DCM? Another way of saying that is in what situations would you support or not support it?
- What difference do you see in gene editing being available at different ages? (Younger child vs older child vs adult)
  - Any guidance on ages, degree of severity etc.?
- What barriers exist for gene editing and gene therapy implementation in patients?
- Does your experience with medical therapies and the healthcare system influence your perspectives and decisions?

**5) We all have personal values and beliefs we live by. How do your personal beliefs and values impact your feelings about gene therapy and gene editing?**

**6). Ranking for preferred strategy for being treated for condition:**

**One-time gene therapy, one-time gene editing, daily pill(s), one time surgery, other invasive procedure (devices)**

**7) You ranked ___ as your first preference. Could you explain your reasoning?**

**8) If both gene therapy and/or gene editing were an option to treat your condition, would you choose to pursue it or not? You could also choose not to pursue any of these. If so, which one, gene therapy or gene editing?**

**9) Based on your experience, your views on gene therapy and gene editing, and personal factors, values etc, what level of quality improvement would you want and what risks would you be willing to take? Where do you fall on that scale?**

Probes:

- Take risk of side effects to have no risk of death but still have symptoms
- Take risk of uncertainty of side effects if it means you are symptom-free or if it means your symptoms don't progress?
- Which symptoms would you want the gene therapy/gene editing to mitigate, and which symptoms would you be okay still managing?
- Risks for physical vs cognitive benefits etc.
- What risks would you be willing to take and for what level of quality-of-life improvement?

**10) You chose _____. What factors influence your decision?**

Probe: Contextual factors

- Patient demographics (age they were dx, current age, gender etc.)
- Individual factors (time since dx, experience with the condition)
- Family dynamics: other family members with the condition
- Genetic literacy/knowledge of gene therapy, gene editing, and HCM/DCM

**11) Would you want to be the first person in the world to get it, not widely established or when it’s well established?**

**12) Do you believe that gene therapy and gene editing should have special regulations or oversight as opposed to other medical therapies? What are your reasons for this?**

**13) What other thoughts, feelings or opinions do you have that we didn’t discuss? Any other perspectives about the ethical and social implications of these technologies?**
